# Supplementary material for: SSZ-60: a new large-pore zeolite related to ZSM-23
Source: Royal Society of Chemistry journal article supplement (doi:10.1039/b410010g), 2004-01-01
Supplement: b410010g.pdf [file b410010g.pdf]

## SSZ-60: a New Large-Pore Zeolite Related to ZSM-23

### Supplementary Material

Allen Burton\* and Saleh Elomari

*ChevronTexaco Energy Research Company, 100 Chevron Way, Richmond, California, USA.*

*E-mail: [buaw@chevrontexaco.com](mailto:buaw@chevrontexaco.com); [elom@chevrontexaco.com](mailto:elom@chevrontexaco.com); Fax: +1 510-242-1599; Tel: +1 510-242-1810;*

Fig. 1S. A scanning electron microscopy image of a sample of SSZ-60.

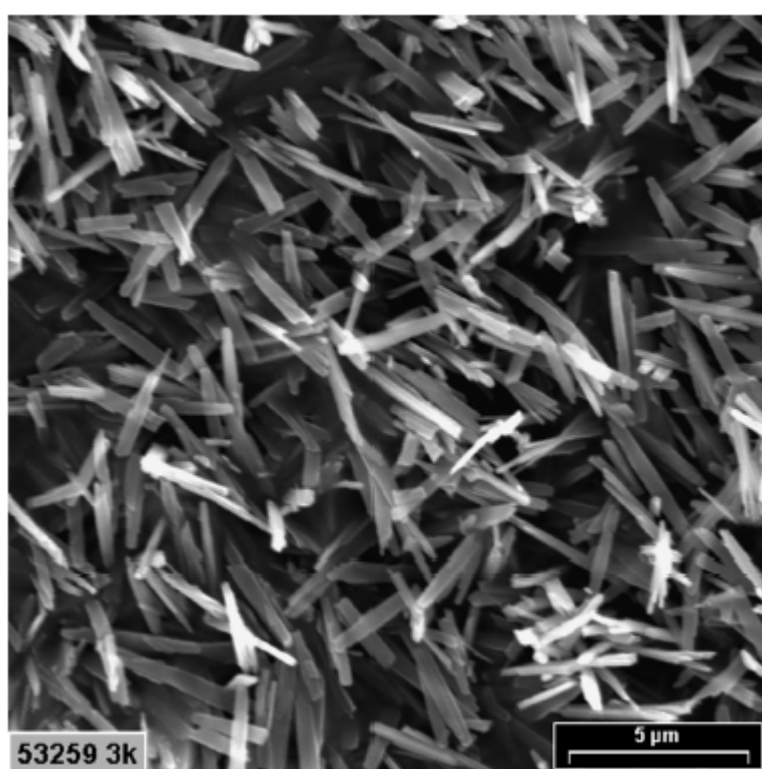

**Table 1S.** Experimental parameters of synchrotron powder X-ray diffraction experiment for SSZ-60.

| Data collection                |                                |
|--------------------------------|--------------------------------|
| X-ray facility                 | Brookhaven National Laboratory |
| NSLS beamline                  | X7A                            |
| wavelength                     | 0.7102 Å                       |
| temperature                    | ambient                        |
| profile range                  | 2-40° 2θ                       |
| step size (°2θ)                | 0.01                           |
| detector                       | Position sensitive detector    |
| Refinement parameters          |                                |
| space group                    | $P2_1nm$                       |
| <i>a</i>                       | 5.0122(2) Å                    |
| <i>b</i>                       | 13.6985(9) Å                   |
| <i>c</i>                       | 21.951(1) Å                    |
| background parameters          | 10                             |
| profile parameters             | 8                              |
| $R_{wp}$                       | 3.33%                          |
| $R_p$                          | 2.55%                          |
| $R_{wp}$ background subtracted | 5.64%                          |
| $R_p$ background subtracted    | 3.80%                          |
| structural parameters          | 70                             |
| $R(F^2)$                       | 0.233                          |
| unique reflections             | 835                            |

**Table 2S.** Refined atomic parameters of SSZ-60 in space group  $P2_1nm$ ; *a* = 5.0122(2), *b* = 13.6985(9), *c* = 21.951(1) Å.

| atom | x        | y         | z         |
|------|----------|-----------|-----------|
| Si1  | 0.996(3) | 0.1398(9) | 1/4       |
| Si2  | 0.962(2) | 0.2195(7) | 0.1205(4) |
| Si3  | 0.069(2) | 0.4046(7) | 0.0530(4) |
| Si4  | 0.980(2) | 0.0805(7) | 0.8776(4) |
| Si5  | 0.495(3) | 0.009(1)  | 1/4       |
| Si6  | 0.568(2) | 0.3817(7) | 0.9700(5) |
| Si7  | 0.478(2) | 0.1768(7) | 0.9256(4) |
| Si8  | 0.464(2) | 0.1251(7) | 0.0655(4) |
| O1   | 0.360(3) | 0.387(1)  | 0.0245(6) |
| O2   | 0.676(3) | 0.120(1)  | 0.8815(6) |
| O3   | 0.543(3) | 0.2915(7) | 0.9263(7) |
| O4   | 0.541(3) | 0.4811(6) | 0.9278(6) |
| O5   | 0.503(4) | 0.138(1)  | 0.9937(4) |
| O6   | 0.696(3) | 0.098(1)  | 1/4       |
| O7   | 0.009(3) | 0.3351(8) | 0.1075(6) |
| O8   | 0.022(3) | 0.208(1)  | 0.1913(3) |
| O9   | 0.197(3) | 0.052(1)  | 1/4       |
| O10  | 0.161(3) | 0.156(1)  | 0.0817(7) |
| O11  | 0.510(3) | 0.0140(8) | 0.0822(7) |
| O12  | 0.040(3) | 0.058(1)  | 0.8084(3) |
| O13  | 0.660(3) | 0.194(1)  | 0.1032(8) |
| O14  | 0.860(3) | 0.385(1)  | 0.9988(6) |
| O15  | 0.177(3) | 0.1633(9) | 0.9019(7) |

**Table 3S.** Coordinates of hypothetical model that may be derived from the MTT structure; in space group  $Pmn2_1$ ; *x* = 26.815, *y* = 11.19, *z* = 4.991 Å.

|     | x       | y       | z       |
|-----|---------|---------|---------|
| O1  | 0.40387 | 0.21975 | 0.34281 |
| O2  | 0.3309  | 0.32038 | 0.60752 |
| O3  | 0.32579 | 0.094   | 0.47691 |
| O4  | 0.31838 | 0.25901 | 0.10767 |
| O5  | 0.44181 | 0.35749 | 0.97211 |
| O6  | 0.44187 | 0.42682 | 0.47198 |
| O7  | 0.24073 | 0.02849 | 0.26858 |
| O8  | 0.09644 | 0.44494 | 0.34087 |
| O9  | 0.3151  | 0.48468 | 0.97138 |
| O10 | 0.5     | 0.2525  | 0.31947 |
| O11 | 0       | 0.47641 | 0.31947 |
| O12 | 0.17606 | 0.32314 | 0.20835 |
| O13 | 0.14846 | 0.33458 | 0.70821 |
| O14 | 0.24312 | 0.34042 | 0.83046 |
| O15 | 0.19294 | 0.14196 | 0.88914 |
| Si1 | 0.1514  | 0.40708 | 0.43183 |
| Si2 | 0.44689 | 0.3139  | 0.27659 |
| Si3 | 0.44673 | 0.47023 | 0.77689 |
| Si4 | 0.30202 | 0.35133 | 0.87916 |
| Si5 | 0.19006 | 0.28463 | 0.90881 |
| Si6 | 0.21708 | 0.01663 | 0.97542 |
| Si7 | 0.34469 | 0.22329 | 0.38405 |

**Table 4Sa.** Atomic distances and Si-O-Si angles of SSZ-60 framework atoms.

| Si-O distances (Å) |       |         |       | T-O-T Angles (°) |     |
|--------------------|-------|---------|-------|------------------|-----|
| Si1-O6             | 1.611 | Si7-O2  | 1.587 | Si3-O1-Si6       | 154 |
| Si1-O8             | 1.592 | Si7-O3  | 1.605 | Si4-O2-Si7       | 142 |
| Si1-O8             | 1.592 | Si7-O5  | 1.592 | Si6-O3-Si7       | 142 |
| Si1-O9             | 1.574 | Si7-O15 | 1.607 | Si3-O4-Si6       | 130 |
| <Si1-O>            | 1.592 | <Si7-O> | 1.598 | Si7-O5-Si8       | 162 |
|                    |       |         |       | Si1-O6-Si5       | 151 |
| Si2-O7             | 1.627 | Si8-O5  | 1.597 | Si2-O7-Si3       | 139 |
| Si2-O8             | 1.593 | Si8-O10 | 1.616 | Si1-O8-Si2       | 147 |
| Si2-O10            | 1.579 | Si8-O11 | 1.581 | Si1-O9-Si5       | 151 |
| Si2-O13            | 1.596 | Si8-O13 | 1.591 | Si2-O10-Si8      | 149 |
| <Si2-O>            | 1.599 | <Si8-O> | 1.596 | Si4-O11-Si8      | 155 |
|                    |       |         |       | Si4-O12-Si5      | 149 |
| Si3-O1             | 1.607 |         |       | Si2-O13-Si8      | 147 |
| Si3-O4             | 1.627 |         |       | Si3-O14-Si6      | 154 |
| Si3-O7             | 1.557 |         |       | Si4-O15-Si7      | 141 |
| Si3-O14            | 1.608 |         |       | <Si-O-Si>        | 148 |
| <Si3-O>            | 1.600 |         |       |                  |     |
| Si4-O2             | 1.620 |         |       |                  |     |
| Si4-O11            | 1.575 |         |       |                  |     |
| Si4-O12            | 1.579 |         |       |                  |     |
| Si4-O15            | 1.597 |         |       |                  |     |
| <Si4-O>            | 1.593 |         |       |                  |     |
| Si5-O6             | 1.577 |         |       |                  |     |
| Si5-O9             | 1.602 |         |       |                  |     |
| Si5-O12            | 1.594 |         |       |                  |     |
| Si5-O12            | 1.594 |         |       |                  |     |
| <Si5-O>            | 1.592 |         |       |                  |     |
| Si6-O1             | 1.587 |         |       |                  |     |
| Si6-O3             | 1.571 |         |       |                  |     |
| Si6-O4             | 1.653 |         |       |                  |     |
| Si6-O14            | 1.595 |         |       |                  |     |
| <Si6-O>            | 1.602 |         |       |                  |     |

**Table 4Sb.** Tetrahedral angles of framework atoms in SSZ-60.

| Tetrahedral Angles (°) |       |             |       |
|------------------------|-------|-------------|-------|
| O6-Si1-O8              | 106.5 | O2-Si7-O3   | 110.8 |
| O6-Si1-O8              | 106.5 | O2-Si7-O5   | 111.0 |
| O6-Si1-O9              | 108.8 | O2-Si7-O15  | 109.5 |
| O8-Si1-O8              | 108.0 | O3-Si7-O5   | 107.7 |
| O8-Si1-O9              | 113.3 | O3-Si7-O15  | 107.9 |
| O8-Si1-O9              | 113.3 | O5-Si7-O15  | 109.9 |
| <O-Si1-O>              | 109.4 | <O-Si7-O>   | 109.5 |
| O7-Si2-O8              | 104.1 | O5-Si8-O10  | 107.8 |
| O7-Si2-O10             | 110.7 | O5-Si8-O11  | 108.4 |
| O7-Si2-O13             | 108.3 | O5-Si8-O13  | 111.9 |
| O8-Si2-O10             | 110.4 | O10-Si8-O11 | 109.5 |
| O8-Si2-O13             | 112.9 | O10-Si8-O13 | 108.3 |
| O10-Si2-O13            | 110.3 | O11-Si8-O13 | 110.9 |
| <O-Si2-O>              | 109.5 | <O-Si8-O>   | 109.5 |
| O1-Si3-O4              | 109.1 |             |       |
| O1-Si3-O7              | 112.4 |             |       |
| O1-Si3-O14             | 106.0 |             |       |
| O4-Si3-O7              | 111.9 |             |       |
| O4-Si3-O14             | 107.1 |             |       |
| O7-Si3-O14             | 110.1 |             |       |
| <O-Si3-O>              | 109.4 |             |       |
| O2-Si4-O11             | 109.8 |             |       |
| O2-Si4-O12             | 107.4 |             |       |
| O2-Si4-O15             | 109.0 |             |       |
| O11-Si4-O12            | 111.2 |             |       |
| O11-Si4-O15            | 109.6 |             |       |
| O12-Si4-O15            | 109.9 |             |       |
| <O-Si4-O>              | 109.5 |             |       |
| O6-Si5-O9              | 108.5 |             |       |
| O6-Si5-O12             | 110.7 |             |       |
| O6-Si5-O12             | 110.7 |             |       |
| O9-Si5-O12             | 110.0 |             |       |
| O9-Si5-O12             | 110.0 |             |       |
| O12-Si5-O12            | 106.9 |             |       |
| <O-Si5-O>              | 109.5 |             |       |
| O1-Si6-O3              | 116.1 |             |       |
| O1-Si6-O4              | 109.5 |             |       |
| O1-Si6-O14             | 107.7 |             |       |
| O3-Si6-O4              | 107.4 |             |       |
| O3-Si6-O14             | 109.9 |             |       |
| O4-Si6-O14             | 105.7 |             |       |
| <O-Si6-O>              | 109.4 |             |       |
